# Supplementary material for: A systematic dissection of human primary osteoblasts in vivo at single-cell resolution
Source: Aging (Albany NY). 2021 Aug 24;13(16):20629–50. doi: 10.18632/aging.203452 (PMC8436943; doi:10.18632/aging.203452)
Supplement: Supplementary Table 1 [file aging-13-203452-s002.xlsx]

## Sheet: Sheet 1
Supplementary Table 1. The number of genes/number of UMIs detected per cell.
nCount_RNA	nFeature_RNA
9967	3625
2049	1039
5041	2120
9370	3267
17966	3702
3930	1818
5761	2313
4039	1920
7457	2448
6950	2445
6544	2644
11973	3730
8431	2978
1949	929
8617	3015
3228	1642
70387	5043
58691	6564
4697	2063
2007	1106
2020	1019
8238	2909
9383	3142
4310	1845
13623	3806
4143	1991
17076	4688
6642	2427
10619	3290
5363	1973
10216	3243
5980	2500
7486	2711
8174	2844
2828	1383
5168	2124
4667	2028
4383	1986
3422	1642
21417	5468
2306	1171
2801	1556
4217	1579
12894	549
3982	1806
5211	2217
2826	1509
3427	1589
6422	2417
6917	2634
7953	2828
4452	1946
3097	1829
2255	1164
3735	1908
9099	3087
19729	3262
9336	2966
5559	2082
8170	2046
21529	4425
3830	1779
13783	1655
1581	761
1461	940
4797	1708
12932	527
7522	2899
13251	4005
10753	3452
8372	3015
16519	4356
1607	745
9220	3320
6698	2661
4896	1899
9542	3226
42355	4925
19400	3807
7250	2588
4683	2173
3024	1446
9248	3253
2956	1511
5580	2350
16974	693
3520	1511
6038	2475
2569	1332
4149	1826
8436	2887
4613	2002
5838	2443
15652	4202
4209	2038
4168	1837
2603	1199
3519	1546
2237	1222
2354	1267
2554	1329
62597	6140
34867	3208
7897	2869
9347	3233
8981	3180
8222	2295
7162	2815
7821	3085
6384	2060
75741	5931
16682	2331
6283	2420
2240	1215
5598	2389
5357	2068
3657	1760
7602	2757
6784	2485
4520	2221
47474	5349
12684	3684
7171	2896
3195	1199
3051	1703
3697	1624
1845	1053
4926	1999
8655	2523
9095	3151
1142	552
5141	2157
15733	747
8976	2937
15842	928
7149	2760
3934	1701
6064	2339
8872	3220
34493	4263
12259	3774
6455	2645
31042	3964
5245	2101
2642	1243
43877	3097
13911	3865
14488	234
8787	3059
5262	2203
11635	3414
7606	2870
5547	2270
3937	1800
29143	6585
7530	2980
7565	2900
2076	972
4944	2141
8886	3120
8998	3210
7702	2866
8451	3034
12818	235
4951	2148
3190	1329
2318	1115
6821	2927
2429	1282
7118	2641
16698	925
10981	3632
8665	3264
3998	1970
4878	2138
16569	736
9509	3369
12914	3691
8365	2902
15803	3704
3977	2023
7989	2620
5874	2429
9732	3337
16907	681
13903	3867
1493	772
17359	4598
8457	2525
1138	717
6490	2501
1416	859
5760	2288
6765	2616
6813	2563
15034	4619
5082	2189
9319	3048
4783	2263
5052	1890
2458	1134
7453	2686
5433	2546
19395	1725
3569	1145
5232	2235
4615	2075
7781	2788
8408	2877
7587	2804
15354	220
7713	2778
54639	5696
4917	1937
9341	2840
16167	772
5156	2194
4578	1592
19702	333
10395	3299
4754	2063
10004	3298
23268	2320
10292	3209
9511	3348
13248	209
2846	1339
7064	2813
3960	1741
9327	3002
3685	1803
5103	1832
13020	3796
11658	3388
11847	3265
4105	2051
5323	2093
1894	910
2814	1409
10367	3328
4788	2158
3389	1584
3308	1516
5584	2263
6866	2306
9001	3142
3248	1670
12392	3756
6534	2622
1246	620
11480	203
6382	2434
3583	1846
1897	895
4953	2131
4129	1889
7679	3163
15025	4108
63657	6330
2129	1122
17052	3517
8772	2689
2049	1042
4139	1786
3581	1623
8305	2407
29351	2175
5310	2175
52264	6140
19316	4883
6549	2381
9584	3183
10339	3757
6424	2590
9245	2794
5331	2194
1316	720
4010	1696
3386	1708
6984	2466
1110	614
4341	2156
4666	1966
27086	2719
3517	1604
5855	2500
2863	1434
3494	1605
7898	2829
10670	3347
3784	1606
4523	2083
5648	2087
1564	859
3820	1773
45287	5236
4400	1938
5530	2162
21121	4782
7826	2668
8403	2963
7323	2419
3289	1433
2937	1340
5168	1925
4277	1882
20773	707
3986	1631
3528	1572
3219	1390
6948	2454
2882	1421
5338	2353
1887	1058
3761	1657
9948	3107
6492	2527
10414	3615
30047	3384
5577	2491
5982	1966
7837	3087
3675	1810
1812	964
5023	2099
3274	1626
5124	2305
5808	2567
4960	2226
3125	1545
2343	1277
10973	3575
1648	969
6828	2639
3075	1455
3036	1355
8427	3034
9884	3314
9989	3312
4655	2071
4116	1945
4230	1939
7398	2652
6949	2462
2859	1379
4714	1801
2720	1264
16818	317
4675	2179
873	501
13943	3936
5989	2496
2813	1505
12626	3173
16305	3710
2780	1285
649	368
4410	2073
13557	3652
4692	2026
11344	3536
3771	1743
62977	5303
5114	2147
2822	1378
2787	810
11638	3585
5218	2333
4083	1961
6740	2774
1173	701
1589	1058
3033	1520
3757	1805
1936	1075
8521	2795
2851	1431
7857	3114
12220	3586
5611	2302
517	364
4781	1803
15302	720
5935	2452
7335	2930
4208	1485
4773	2056
6946	2646
5706	2392
7168	2475
7617	2886
5096	2452
9763	3553
60798	5801
7091	2702
5858	2425
2392	1171
4447	2023
4902	2160
2136	1198
2120	1006
6867	2369
5342	2347
3438	1429
2628	1257
8439	3055
1333	685
4200	1741
5302	2243
7592	2744
3330	1509
8867	3078
2863	1439
5600	2367
3872	1469
1592	845
7119	2771
10404	794
1019	408
10058	3542
14656	844
41968	4673
2604	1315
6221	1666
2989	1428
4381	2041
2212	1126
17528	230
4861	1988
10107	3389
3187	1653
12622	756
5620	2425
45374	5685
10350	2971
1736	974
14220	542
7303	3245
12009	4080
3761	1784
4474	1717
9469	1498
2062	1170
13483	298
6167	2680
10719	3471
5397	2216
3407	1383
9298	3020
2866	1437
7882	2705
17284	1746
2194	1199
10790	3574
9502	3447
10777	3364
4682	1993
10463	3427
2399	1275
3236	1542
3847	2086
30318	2549
1407	921
6104	2340
12845	4037
15686	4025
2460	1206
9841	3400
8513	3180
2907	1573
5468	2244
12126	3984
7085	2596
9852	3502
13591	3642
8078	2984
5137	2174
10614	2968
4674	2087
5660	2339
5512	2354
1361	717
1972	996
2995	1317
7774	3025
1677	785
8546	3032
11399	3128
18572	4967
20563	4821
16059	347
2882	1332
3813	1772
6232	2577
7802	2964
2210	1021
742	307
5020	2171
4792	2243
9809	3242
2112	832
4019	1846
9849	3394
981	432
1742	994
1790	1066
6597	2706
7613	2704
5827	2360
6266	2274
6005	2247
9678	3236
3224	1684
8978	3282
16243	4422
5148	1896
4891	2152
10794	3421
5489	2351
6621	2617
9105	3142
5257	2157
2528	1141
7332	2903
15844	4411
10404	3713
2723	1351
4799	1968
8607	3131
7672	2893
9170	3157
7485	2791
5604	2453
16521	4191
1327	769
5578	2024
6872	2760
9282	214
16630	4297
5161	2167
2741	1293
33023	3583
15420	3975
15293	1252
18208	563
7294	3016
19334	4030
21603	5101
964	600
30921	3331
7563	2753
8723	2951
7356	2828
8450	3226
3754	1611
1200	642
2020	1156
8103	3023
6808	2433
37362	2441
591	250
8136	2957
4909	1993
1867	998
9765	3261
610	330
30426	3997
4619	2150
2681	1303
5616	2252
13615	4130
5594	1908
12280	3984
4436	2099
9235	2964
7831	3025
41709	4785
2502	1479
12088	3598
3431	1718
3435	1698
8306	2976
3932	1811
5308	2255
5880	2364
1245	713
5819	2293
7361	2622
11601	3476
1416	708
9870	3160
10641	3382
5238	2109
2868	1379
30813	6275
8841	3099
3279	1500
6445	2771
3707	1907
3973	1856
14631	3298
1051	366
12427	3757
1404	737
10228	1832
4571	2179
3475	1532
45752	5348
3094	1442
26116	2844
6069	2473
3814	1809
2743	1322
7448	2640
15744	282
6516	2596
9619	3340
2940	1530
8632	2324
1003	557
2316	1279
3139	1545
4211	1985
4310	2005
7722	2644
54259	5708
3672	1804
9739	2953
3478	1654
4701	2160
10529	3590
3617	1770
2270	1219
2407	1260
7423	2776
3743	1685
6292	2449
4238	2026
19444	4818
7827	2894
8108	3000
6369	2543
2611	1220
18285	4510
4457	1858
3622	1363
2968	1397
10866	3521
15182	4065
3623	1286
9071	3412
3400	1621
5567	2105
6026	2350
10137	2685
17846	296
8635	3187
6280	2527
3896	1804
8444	3011
24213	5379
4834	2083
7066	2179
9515	3520
6453	2313
4485	2183
3267	1511
6507	2311
6408	2541
10349	3127
2492	1066
15522	4274
15755	583
2910	1506
5208	1759
1209	554
5697	2102
6984	2429
8461	2968
6475	2648
10998	266
4774	2315
34677	3697
5450	2120
14970	4510
8269	2778
11762	3712
10684	3121
7753	2792
1725	965
8392	3066
5702	2459
4978	2087
4172	1878
42827	5457
16969	4828
4612	2000
2199	1220
6732	2492
48317	4329
4945	2105
13406	215
8611	3022
13912	4026
10641	3293
25195	2494
5721	2447
4377	1768
15379	665
2702	1355
11774	3412
1880	821
8644	2858
2678	1388
5304	2394
5221	2421
7648	2819
3857	1739
2323	1200
1977	1150
5186	1734
9113	230
5918	2387
12864	3559
9461	3085
2916	1305
105220	5865
7838	2991
5080	2186
10041	3361
3216	1454
1751	862
1559	952
6341	2554
5533	2318
7630	2821
10232	3328
1971	1099
8641	3169
4464	2008
663	459
20220	308
3889	1710
44704	4969
5763	2282
4417	2013
2879	1463
1868	1012
6021	2507
9702	3372
9017	3159
9098	3295
4866	2030
2705	1363
9766	2699
1769	1015
25657	5508
8869	2947
6434	2449
7289	2362
5898	2243
5020	322
3304	1478
18185	3873
2629	1375
948	464
9136	2973
8193	2379
6925	1988
6534	2456
2977	1608
4977	2217
1958	987
8928	2554
8898	2955
5969	2602
2708	1281
712	487
5353	2050
5225	2017
40098	4579
9055	3098
5391	2395
19916	622
582	386
24537	3741
24114	3762
4146	1863
4496	1903
4516	2006
7418	2658
5432	2261
6567	2486
2933	1346
9325	2859
5058	2310
15486	717
1016	576
4912	2040
3480	1564
5051	2217
3659	1751
8105	3126
4187	1808
935	585
595	428
4445	2028
9344	3189
26682	4292
1405	765
1261	641
12093	3598
3405	1449
3438	1792
8867	3326
8036	3210
4752	1827
6991	2579
7344	2918
14479	4033
2097	1289
1644	854
3553	1546
14239	3779
1271	737
10677	2927
3422	1489
2987	1672
9985	3200
5291	2294
10361	3353
5192	2200
7743	3134
1891	969
5789	2433
39409	4686
5384	2195
7296	2795
1329	803
13413	4206
6812	2538
12829	4129
4993	2216
7134	2769
10374	3371
6172	2243
4447	1743
5021	2098
9522	3161
4840	1900
1236	814
3400	1564
11826	3482
13495	3955
6941	2634
7059	2785
7809	2968
3906	1630
12218	3512
2637	1292
1526	928
10113	3251
9640	3231
2632	1475
1722	949
4454	1843
7013	2574
1896	1015
5718	2130
10511	3193
4172	1882
3896	1724
861	592
7530	2304
5087	2153
9185	3291
12539	251
11129	3420
3996	1888
6827	2651
22949	4632
4299	2006
9021	3241
4977	2274
10997	3332
8362	3155
7407	2878
3880	1646
7343	2806
1823	1041
2872	1338
6469	2089
12555	3900
6702	2678
10602	3378
6871	2655
7590	2804
10378	3396
67457	5978
4336	2085
3368	1612
18003	1946
8270	2517
11199	2282
5681	2381
7602	2646
921	504
9306	3414
4151	1804
12070	3655
9984	3312
5193	1949
8752	3033
14331	3992
10265	3322
7347	2945
6094	2476
3419	1575
7213	2621
2315	1253
31512	3131
7108	2655
3611	1697
2568	1247
4652	1968
6221	2335
7492	2784
17349	3768
8045	2713
7545	2928
10213	3303
3111	1400
6631	2452
2465	1310
4697	2154
3293	1638
7147	2812
40546	2503
17933	4640
3594	1725
10326	3252
3068	1580
1866	1039
1979	1105
3332	1602
12825	3727
11012	3582
1112	630
6138	2717
1402	663
4540	2204
12593	3399
7889	2836
34404	3012
11436	3688
2823	1326
8367	3038
827	498
2794	1377
7920	2835
10926	3451
3836	1711
10461	3285
3939	1792
4565	1942
4186	2061
2344	1260
1260	593
6808	2584
54821	5558
6294	2449
5583	2407
4041	1875
9997	3348
5735	2269
2679	1340
5720	2194
6738	2316
2856	1615
8788	3270
1334	797
4629	2203
5686	2309
4634	2209
2369	934
4978	1647
6360	2565
4529	2028
1725	809
1307	652
1954	911
6029	2545
4076	1841
7707	2671
746	417
3094	1569
6376	2602
5255	2050
7142	1834
5536	2262
7365	2746
29313	4943
7676	2804
8389	2974
5109	2062
2355	1290
10548	3124
9673	3191
4566	2079
5097	1985
10766	3554
4727	2029
8752	3150
5846	1862
2950	1458
3387	1609
17388	4340
3687	1537
6961	2596
5303	2237
994	599
5944	2275
6338	2561
3434	1434
13762	3687
4172	1978
10170	3250
4963	2006
32009	4839
6714	2562
17845	4840
6723	2482
16936	4469
4657	1976
3593	1742
3948	1812
12402	3284
1155	760
17817	4482
9054	3280
2809	1421
7193	2688
6515	2740
18116	3853
6941	2689
8043	2977
3803	1809
8000	2728
15932	4533
57890	5625
5099	2208
6106	2239
6052	2389
6904	2265
73384	6691
1871	993
29697	4179
3529	1851
11286	3577
5135	2098
6132	2068
6261	2175
3799	1595
5948	2501
23451	2261
8081	2409
4280	2152
7271	2987
8180	2891
1514	767
2322	1287
7825	2691
3865	1686
2478	1235
6290	2449
2814	1359
9813	3294
9338	3026
5285	2116
6113	2183
5720	2305
2564	1313
10556	3297
10649	3579
21204	5481
2357	1064
2210	1159
5681	2332
3010	1454
3493	1685
5799	2466
10218	3223
5817	2308
14137	3853
3591	1922
4321	1961
6632	2627
5279	2181
5780	2078
7712	2962
3926	1760
1842	988
13902	1852
10097	3648
4492	1980
3095	1492
7331	2705
12075	3601
5107	1507
5132	1994
9354	3014
3518	1739
8067	2939
1112	482
6383	2426
2832	1257
5152	2108
6753	2700
1559	1058
8447	2952
5045	2288
1740	938
8777	3067
3551	1551
7335	2688
10443	3499
1373	717
2893	1425
8425	3115
12274	3796
2329	1311
8489	3186
8216	2908
542	287
3585	1722
4148	2100
6521	2390
5068	2150
2602	1292
1600	955
1377	774
6968	2413
7014	2673
9411	3148
3130	1573
3732	1777
59921	5633
2713	1255
5773	2143
1723	1016
8302	3049
6191	2259
1933	974
10804	3265
14484	993
4113	1955
6671	2616
14566	4104
3637	1669
10152	3531
11223	3913
3421	1717
6589	2670
4711	2232
23700	2521
14192	4175
11878	3371
8936	3220
10034	3302
5646	2336
15624	4336
1736	807
5045	2128
7150	2589
4903	2000
11947	3416
7818	3110
13605	4144
33742	2560
49238	5486
3311	1624
3318	1540
5946	2411
3461	1578
4139	1690
6009	2457
5175	2156
9543	3174
6346	2447
1139	741
7808	2748
11505	3712
5521	2432
10412	3176
17895	1349
4763	1858
87449	2492
563	380
40391	5205
1946	954
17588	255
5013	2088
3311	1712
3127	1454
3841	1811
12102	1252
15501	4393
39447	4081
10496	2116
53769	6088
2647	1328
4927	2042
2145	1237
7481	2833
511	225
5087	2075
3601	1724
4243	1807
3459	1793
2611	1479
5019	2019
48706	4345
5736	2379
1708	794
16096	1603
6407	2442
2826	1371
76466	5943
3008	1551
1215	595
9139	3267
9207	2833
6480	2348
5857	2176
4594	1977
5461	2371
14268	519
5888	2407
3953	1863
13729	3872
4416	1775
7315	2750
817	363
3519	1609
1841	960
2725	1363
5239	2435
1283	764
4057	1759
2798	1387
2267	1199
22682	3881
862	532
13264	2777
44591	2807
5739	2319
1622	854
2469	1169
13947	4476
3524	1488
12412	3659
3835	1734
5820	2440
2102	1057
1869	1045
11534	3708
15515	4370
5686	2337
4907	2226
8335	3087
5974	2432
13558	4136
2824	1407
5383	2340
16199	688
19238	398
14257	307
11822	440
27404	5727
1365	763
7647	3023
2504	1277
2513	1212
3320	1650
6229	2575
8323	2828
12058	3749
1526	877
5884	2072
4996	1569
7584	2818
3260	1517
2442	1334
10051	3198
5874	2355
9396	3106
13746	2961
3391	1687
5121	2428
4991	2035
4607	1960
13188	3901
2360	1076
5090	2142
7139	2955
10992	3601
7356	2693
2701	1370
4996	2075
7025	2841
7963	2694
4478	2083
3829	1982
4473	1955
3239	1521
9847	2903
6182	2269
3553	1700
603	400
3634	1575
11054	3232
16856	267
5215	2235
8318	1769
13832	2004
8610	3002
18616	1753
2016	906
6791	2250
25502	5401
6336	2444
2921	1338
10693	3505
8560	2681
553	281
15918	688
9560	3316
7155	3026
11071	3238
2641	1363
4445	1955
11134	3473
10022	3056
6268	2611
4265	1797
12072	3336
8902	3081
3325	1623
6316	2643
6434	2490
4089	1851
4381	1891
7839	2208
10229	3128
3835	1717
8586	3013
8792	2958
9013	3020
64150	5216
33607	3739
27799	3366
14066	3982
2701	1349
5960	2437
2427	1168
4272	1987
3044	1456
2071	1143
41237	4912
3372	1606
2936	1384
4169	1846
7191	2712
6792	2542
1777	870
5559	2236
8726	2540
48756	5756
16283	430
3856	1660
3242	1690
5085	2168
8901	2737
4482	2115
13556	527
3656	1691
3868	1785
4980	1794
4141	1835
4118	1816
7545	2682
2398	1286
9260	3244
4026	1887
5875	2323
50368	5549
9929	3239
53356	6061
8457	3143
1910	1135
3214	1524
4966	2012
10641	3343
2320	1273
1371	761
1792	892
4326	1895
5058	2046
4821	1966
7671	2804
12220	3650
6435	2432
12418	3343
10826	3426
3918	1864
54050	5338
2656	1066
3580	1592
2419	1283
7035	2727
18888	607
22419	3107
10167	3181
8873	3060
16007	469
4952	2177
9164	2717
5363	2217
3368	1627
3160	1597
3606	1666
11850	3214
4631	2155
14566	3910
4372	1497
7898	2736
8395	3125
3386	1531
5521	1861
13147	3822
10089	3200
7091	2224
2304	1218
4160	1966
5476	2303
4418	2031
3478	1694
7543	2661
5702	2368
1170	529
2748	1335
14175	4329
8210	2092
28372	3981
6821	2723
7889	3218
10453	3624
4470	1802
16853	356
14760	4058
12579	3511
9364	3378
12358	3776
6989	2764
4097	2015
5315	2370
41075	4258
11596	3588
12172	3562
5062	2208
2370	1217
4563	2044
12410	3641
9155	3252
4837	2082
7719	2551
6946	2603
15357	4344
5728	1745
17089	734
6406	2417
7473	2785
6227	2515
5992	2318
8337	2058
19330	790
6329	2702
4282	2013
9183	3018
1931	937
5845	2624
3111	1380
2513	1372
2772	1469
10262	3184
4070	1873
8067	2958
8209	3092
4381	2038
1575	930
6828	2413
5564	2074
4392	1854
51859	4264
5227	2116
7122	2658
7981	2804
7495	2517
7581	2836
6043	1939
4121	1767
1764	1000
4882	1934
4778	2132
8581	3045
5134	2169
5104	2149
6748	2592
9406	2963
7046	2496
7344	2941
8887	2513
8656	2889
9980	3252
5837	2015
7608	2587
14049	3629
2724	1360
2422	1178
8977	3303
4580	2141
21355	3800
12414	3367
7866	2784
5873	2204
3534	1546
3325	1500
7942	3056
5604	2125
11275	3696
7451	2737
32148	2428
10554	3422
1173	721
6685	2168
8673	3115
3130	1558
754	477
30511	2859
3598	1743
7963	2775
54109	5928
9844	2913
9293	3072
507	349
5833	2418
2308	1242
2906	1613
18763	4841
7132	2794
4964	2179
3678	1776
7742	2721
4994	1822
2407	1303
1479	794
5637	2419
14071	1623
935	537
10967	3525
6943	2466
1871	1052
5254	2210
50172	3448
5377	2034
12357	2668
5397	2278
2002	1267
7038	2299
5575	2373
1259	637
7375	2595
9443	3145
2596	1476
5577	2297
17293	433
6162	2380
1863	1020
3900	1857
1406	704
13860	654
3637	1663
11829	3693
4424	1615
7327	2495
3138	1583
4889	2071
51494	5646
5836	2430
5512	2215
5521	2221
6100	2201
8297	2633
12274	3665
4050	1760
2158	1250
10241	3189
89022	4710
15745	2693
3049	1504
3129	1726
17791	1642
9795	3238
23201	4304
3732	1735
9017	2697
1405	778
5837	2418
44077	3794
13502	3755
2385	1238
4847	2264
3510	1600
5079	2293
62622	5151
7687	2792
4735	2251
54945	5483
2532	1446
8739	3142
5979	2367
4449	2221
2141	1238
6608	2767
3229	1240
4426	1786
1213	682
8982	3348
9986	3201
9815	3369
4351	1838
8318	2747
2602	1160
14734	4018
8615	2907
5210	2181
3734	1556
14187	4062
40886	2911
13331	3765
9413	3293
3729	1721
3973	1990
5287	2267
13979	3501
10278	3174
9992	3122
8232	2242
5519	2370
5660	467
7692	3108
3990	1829
3988	1689
10498	3502
1889	939
5233	2404
22358	4842
10751	3575
7605	2765
5058	2089
40615	3673
7038	2767
11226	3148
20509	5317
5298	2161
14688	3987
7304	2533
5730	2263
2793	1284
7708	2768
10896	3509
5194	2141
6434	2574
8548	3139
10114	2140
13176	3847
4590	2162
21285	964
6272	2168
3217	1581
2124	1025
11182	3546
4126	1748
3502	1410
2832	1534
6207	2613
4724	2013
3414	1507
16091	4447
6624	2779
26427	1481
6651	2275
5945	2541
2486	1246
7781	2914
8477	3072
500	330
65663	6056
8915	3210
7442	2931
34051	2284
26104	4019
8136	2945
5047	2242
3195	1399
3505	1556
2581	1346
10102	3307
9575	3412
6913	2570
1867	1011
3828	1478
6547	2328
6394	2593
10813	3236
17245	634
4775	1974
2549	1137
6321	2705
16857	4419
2923	1423
5569	2202
7337	2917
11111	3702
16480	4329
9883	3398
14422	4279
4439	1855
2116	1158
7660	3034
6074	2442
5380	2162
9736	3259
11231	3723
3127	1104
5825	2419
32670	3950
18812	1827
3619	1620
6815	2621
14959	4347
8582	3278
42170	4761
3143	1682
4909	2096
6380	2244
4495	1935
10370	3473
2550	1329
5076	2234
5589	2505
9455	2946
3381	1668
6242	2695
8284	2847
6875	2596
55839	5458
3993	1712
4384	2017
64960	5896
5548	2257
6314	2423
17678	4701
4910	1997
6060	2366
14879	4080
2606	1240
4866	2165
26220	3216
4054	1961
947	627
4218	1913
10607	3333
10275	2002
20560	660
3351	1726
10824	3221
8176	2770
1976	1014
9732	3166
1675	882
3422	1574
14868	223
5620	2240
5311	2494
5888	2387
6031	2458
7519	2816
2193	1162
2278	1198
4279	1949
6463	2780
12479	3613
5993	2510
8167	2891
6347	2417
42120	2842
45984	5036
14210	4074
48343	3531
20634	5099
6456	2692
7219	2818
14142	4094
1204	739
4448	1802
9172	3053
1758	1071
7954	2710
8932	2956
2841	1280
3933	1832
6745	2487
21108	2730
6815	2556
4139	1975
1511	928
4839	2147
5978	2278
992	584
2090	1156
9145	3034
7873	3056
3077	1117
3314	1578
2703	1366
13261	941
2611	1238
11934	3626
1851	1029
12854	3152
3298	1213
6459	2416
5408	2181
1609	866
4275	1808
11180	3636
7916	2879
4839	2016
5950	2410
2343	1224
4301	1912
5444	2215
6478	2429
9993	3392
12564	3349
4222	1906
4404	2034
8108	3327
1102	564
8475	2108
11693	2788
5371	2201
4539	1831
6822	2360
2628	1309
6893	2897
7959	2874
60058	4910
15421	4028
5131	2170
13813	3920
3581	1686
8490	2970
24965	4298
8002	2763
4521	1747
7164	2443
3572	1632
10309	3498
5409	1983
1431	784
5501	2209
4938	2162
1227	688
9760	3268
5239	2025
3611	1848
2644	1208
29696	6281
5787	2267
2869	1412
1504	778
2797	1235
889	598
5590	2302
9892	2533
7064	2691
4852	1941
7521	2831
1458	479
3369	1588
73077	6056
3273	1593
3352	1440
5539	2079
3506	1716
2485	1279
7921	2918
8350	3181
8155	2928
8311	3011
4702	2196
28025	1758
5475	2499
9908	3100
3906	1859
31282	4116
6829	2658
4714	1971
1769	919
2807	1437
4939	1813
3372	1568
18977	1593
6862	2640
14014	3853
1648	545
3964	1846
5624	2016
8939	2937
3759	1859
4060	1909
52739	5105
2533	1303
936	453
25135	5277
2270	1099
6281	1987
35382	4324
5445	2269
8781	3014
4633	2270
2902	1400
5194	2241
3625	1812
1620	1024
4563	1843
7238	2712
10533	3429
12361	1517
2469	1218
3411	1511
6319	2539
4395	2000
1874	890
4125	2109
8472	2797
1946	959
3408	1542
11022	3373
3647	1871
2350	1145
5671	2310
2165	1212
28658	3720
23875	5359
41235	3685
54786	5878
23941	2160
3107	1507
8479	3052
11322	2968
8030	2913
24507	1850
5498	2266
2038	1131
3950	1502
13956	3787
8072	2912
4442	2055
4406	1888
5092	2157
16068	2246
10982	3459
6856	2506
2830	1531
5595	2251
21862	951
13745	3762
1288	429
7239	2889
8046	2824
6099	2527
6601	2712
8925	3013
9854	2748
2976	1395
[truncated: 6,560 more rows]
